# Supplementary material
Source: PubMed Central journal article supplement (PMC8277555)

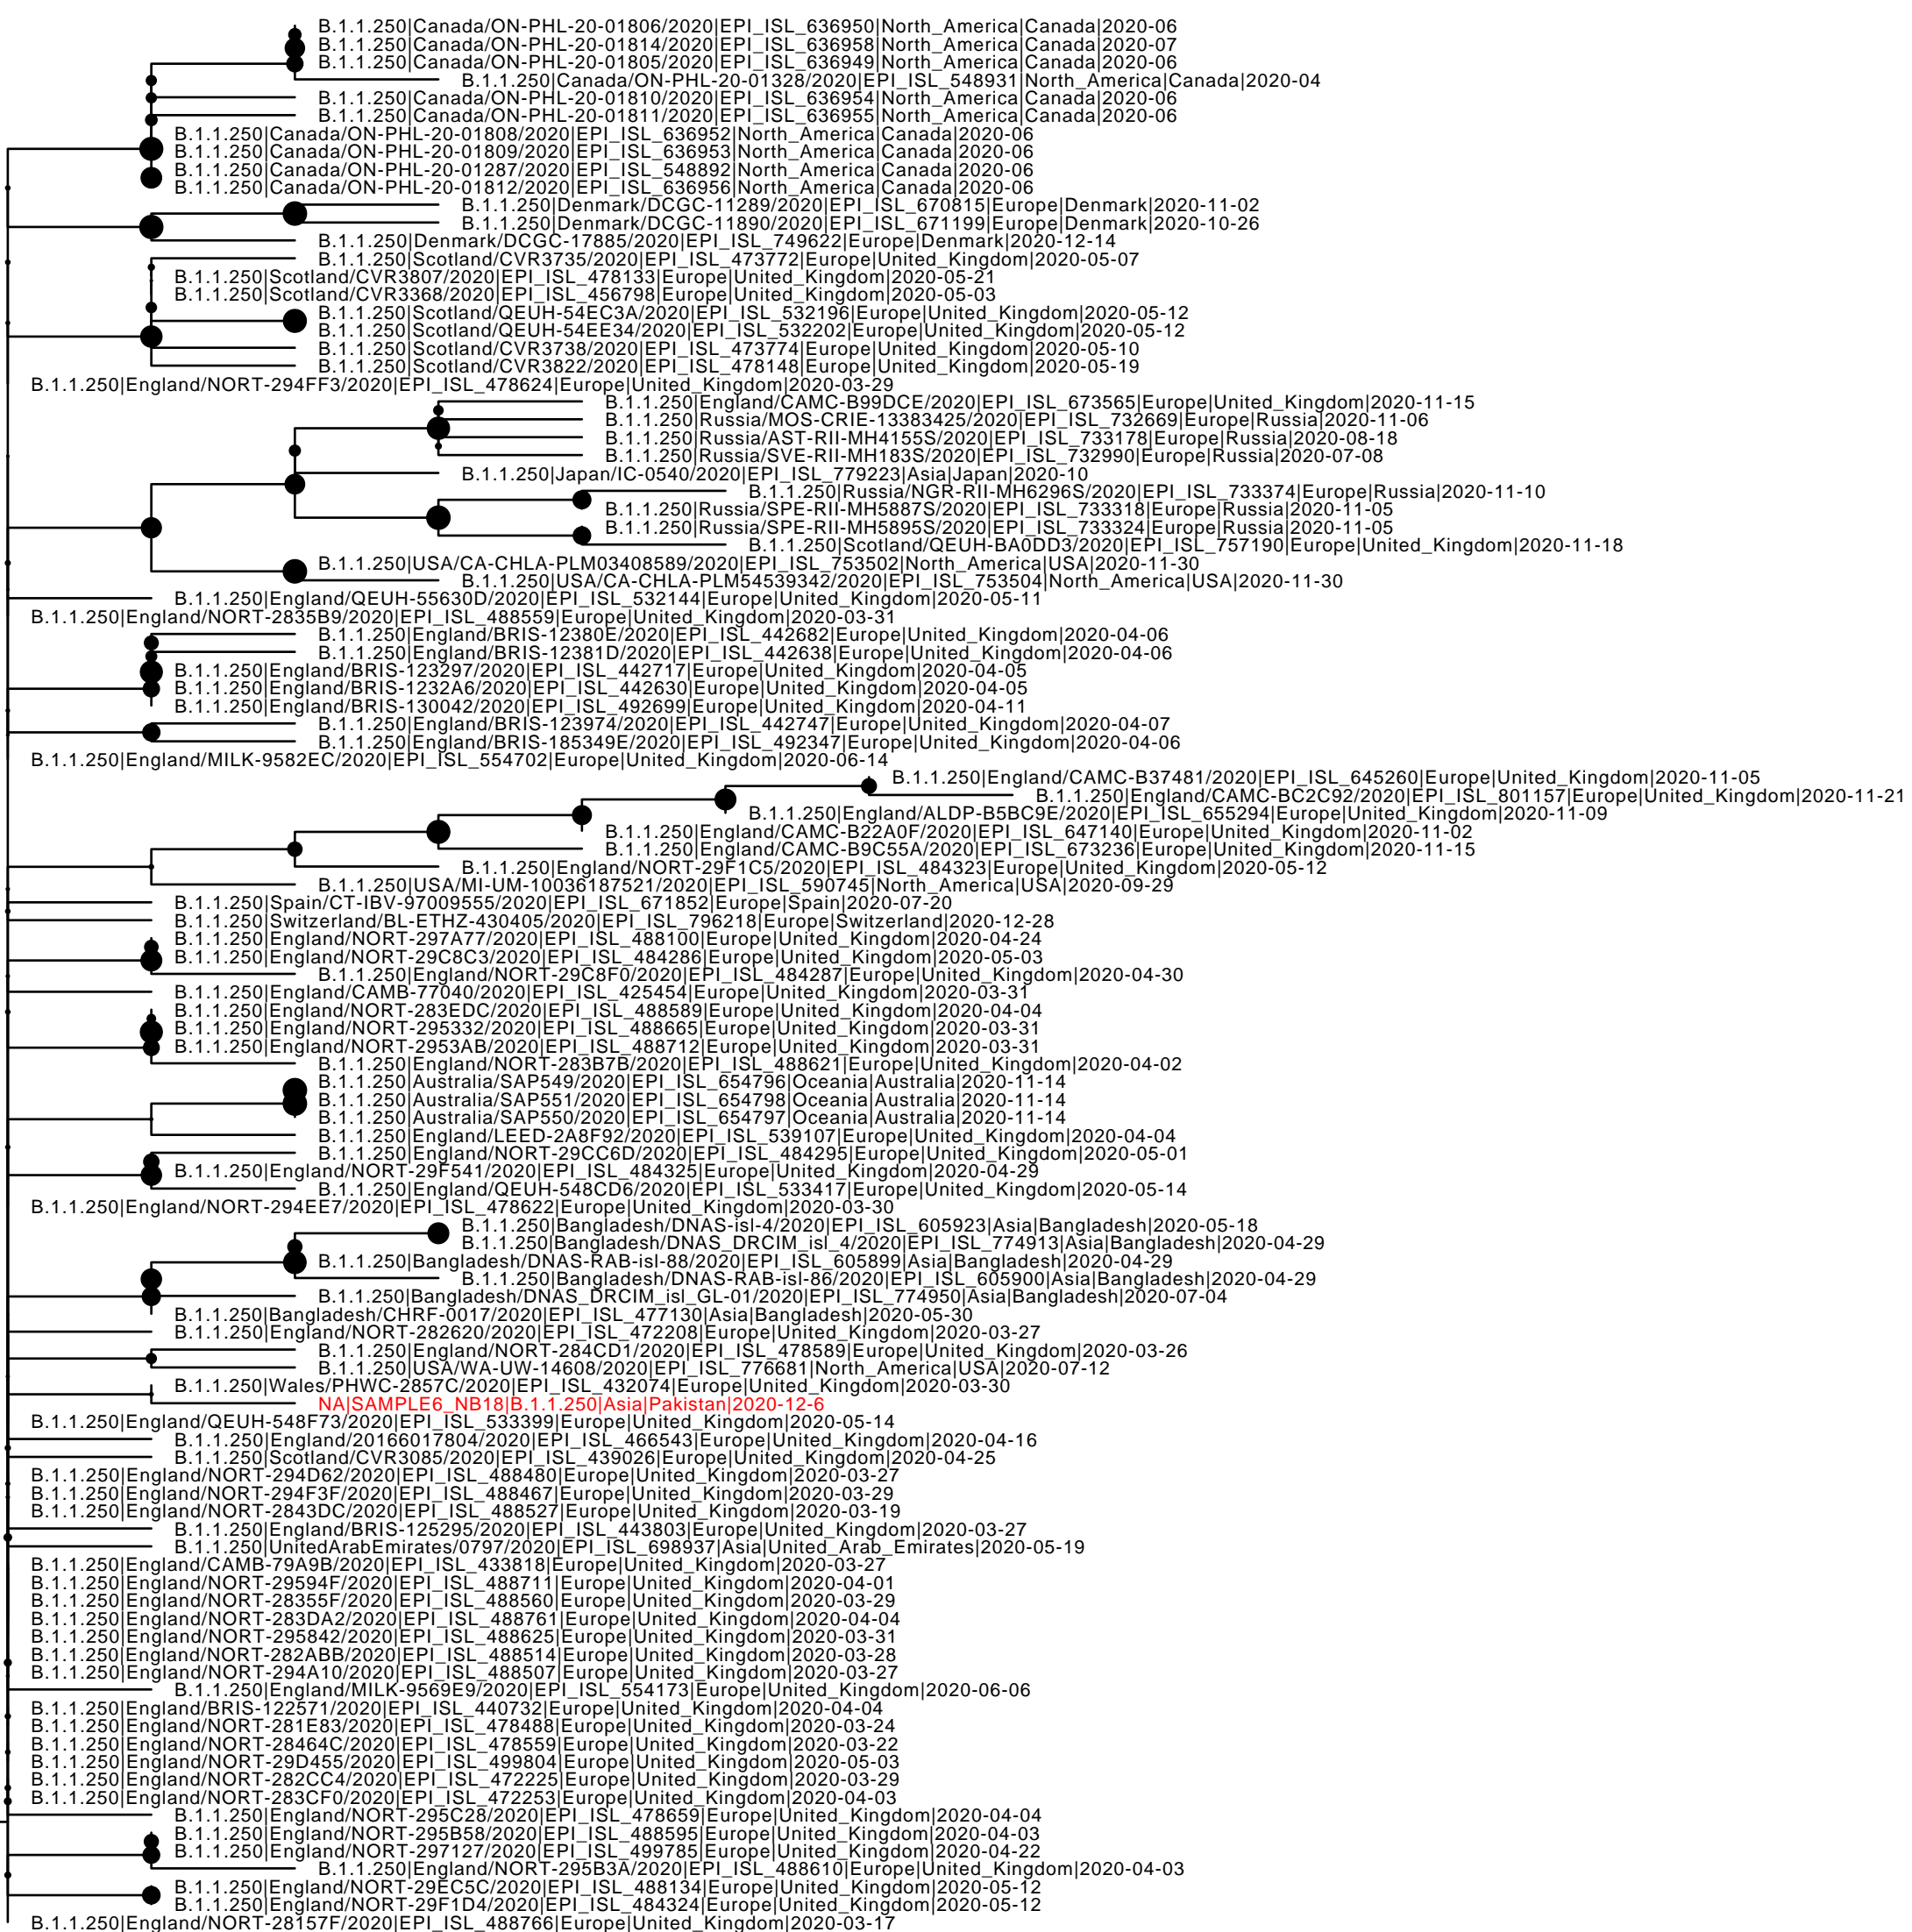

Supplement: mmc1.pdf [file mmc1.pdf]

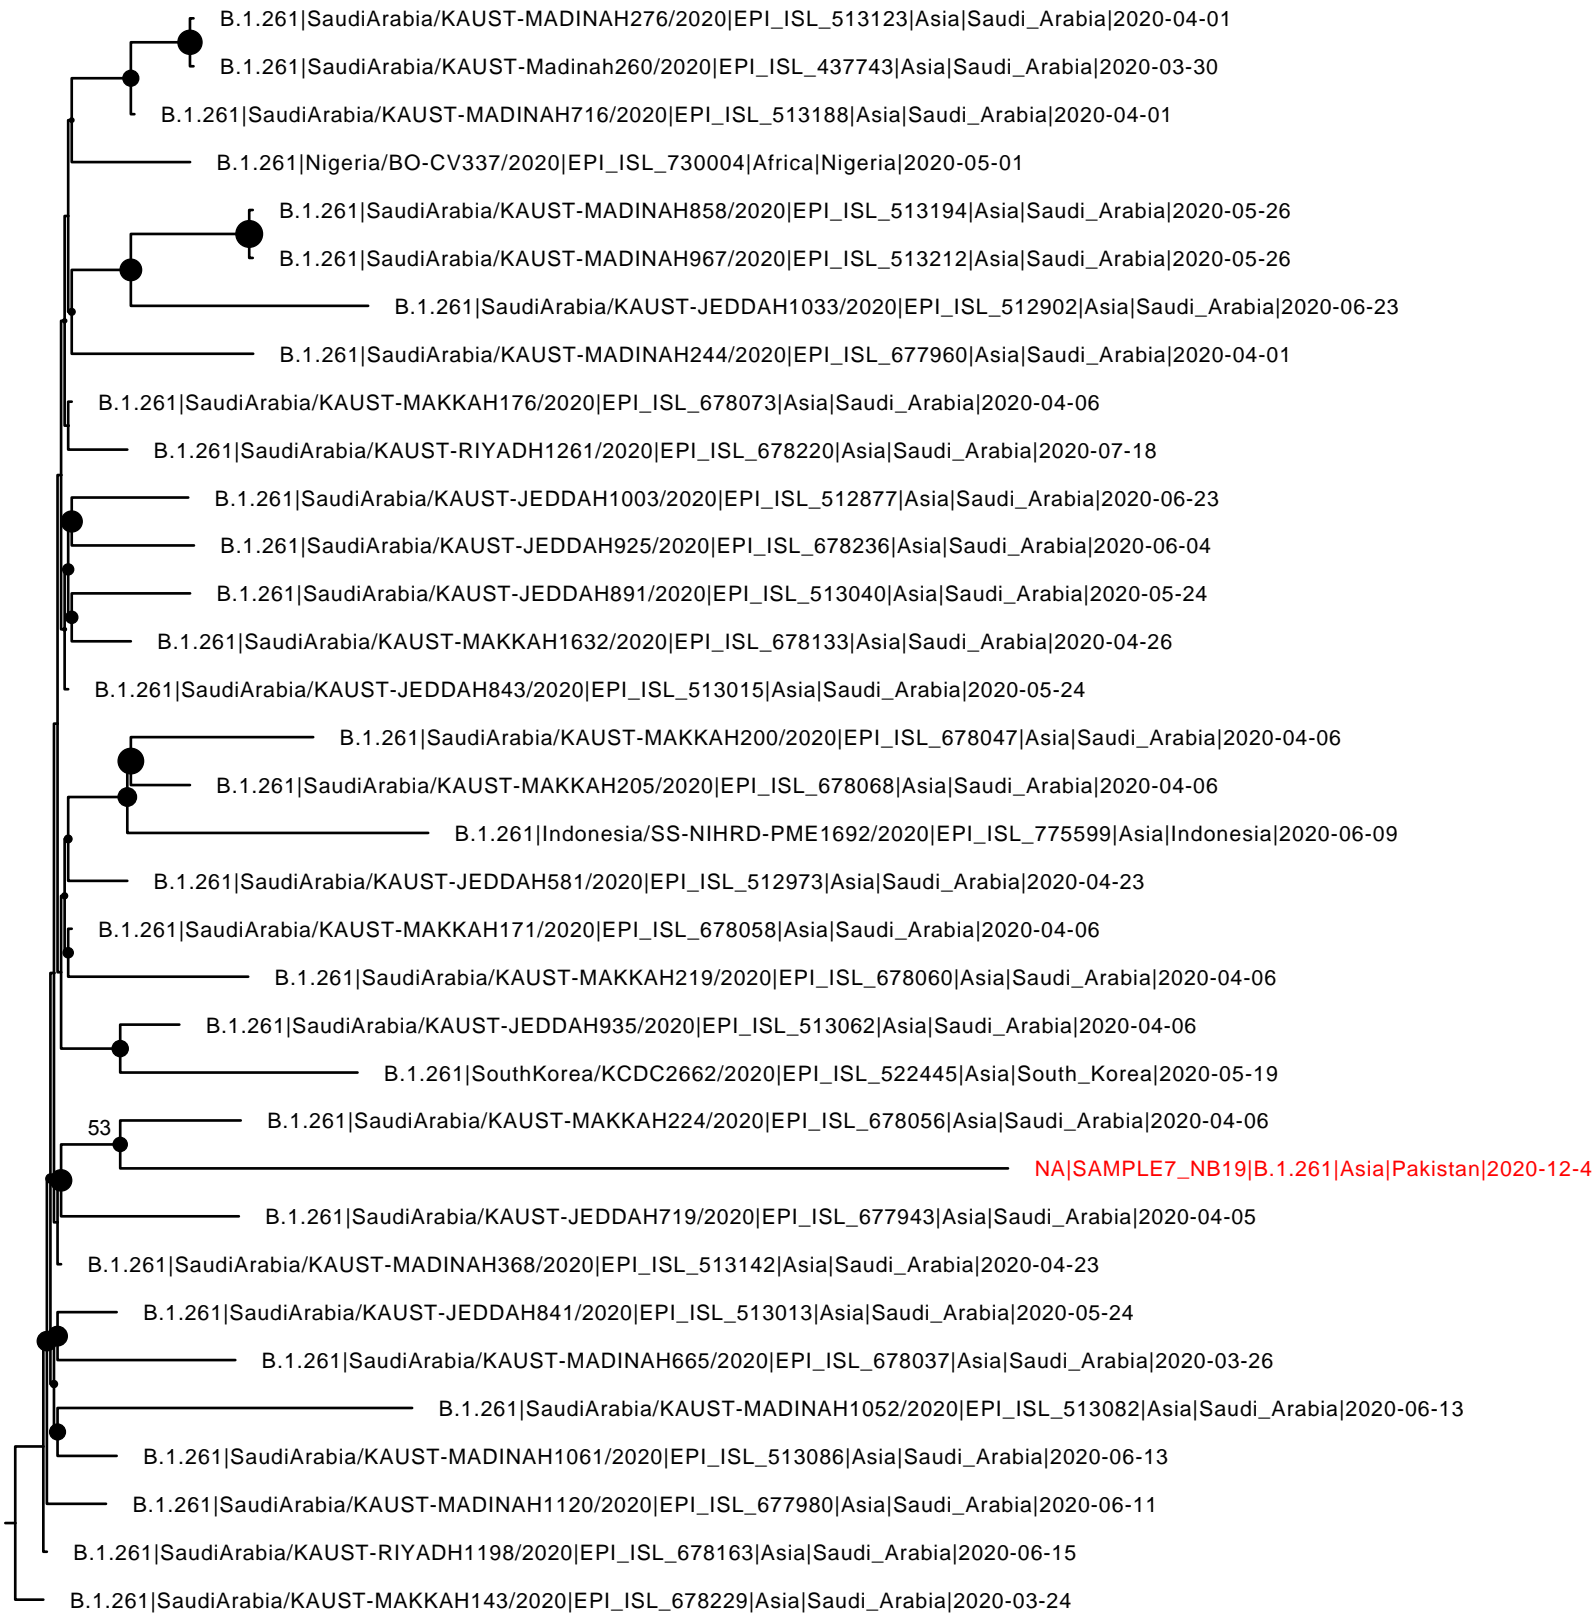

6.0E-5

Supplement: mmc2.pdf [file mmc2.pdf]
